# Supplementary material for: Construction of a self-assessment tool for the readiness of pharmacy departments for internship teaching in public healthcare organizations-An Exploratory Mixed Study
Source: Research Square preprint supplement (doi:10.21203/rs.3.rs-4222246/v1), 2024-04-15
Supplement: Supplementary file 1 [file 54558c2c499b6b717e33c2d8.docx]

Expert informed consent

Pharmacy departments of medical institutions undertake the task of teaching many pharmaceutical interns each year, and hospital pharmacy internship is a key transition stage for pharmacy students to transform into hospital pharmacists. To meet the interns' internship needs and achieve satisfactory internship results, pharmacy departments need to make good preparations in terms of organizational structure, internship content, internship mode, effect evaluation, and emergency management. Therefore, it is important to accurately assess the preparedness of pharmacy departments for internships. The purpose of this survey is to screen out the most important indicators that can best reflect internship teaching, and accordingly construct a self-assessment tool indicator system for pharmacy departments in healthcare organizations to assess their readiness for internship teaching. Given your professional knowledge and practical experience in this field, we would like to invite you as a correspondence expert, we will send you the questionnaire by questionnaire star, and hope that you will return the results within one week after receiving the questionnaire.

We will follow the principles of scientific research keep your information confidential and use it only for statistical analysis. There are no known risks associated with completing this survey. If you experience uncertainty, please contact us immediately so that we can discuss the best way to deal with your problem. If you no longer wish to participate in this study, you may withdraw at any time. If you change your mind after completing the questionnaire, the results of your responses cannot be withdrawn.

I have read and am aware of the information provided and have been allowed to ask questions. I am voluntarily participating in the survey and can withdraw at any time without reason. If you agree and approve of the above, please Please sign your name in brackets and begin answering the questions. If you do not agree or approve of the above, you will be discontinued from this survey project.

Agreed: ( )

A study on the construction of a self-assessment tool for preparing pharmacy departments for internship teaching in healthcare organizations Expert consultation (first round)

Hospital internship is an important part of higher pharmacy education, and the pharmacy department of medical institutions is the main battlefield to undertake pharmacy internship teaching. To meet the interns' internship needs and achieve satisfactory internship results, pharmacy departments need to make good preparations in terms of organizational structure, internship content, internship mode, effect evaluation, and emergency management. Therefore, it is of great significance to accurately assess the preparedness of pharmacy departments for internships. However, there are still deficiencies in related studies in China. In this context, the purpose of this study is to construct a self-assessment tool for the readiness of pharmacy departments for internship teaching in healthcare organizations, to provide a reference for the sound development of higher pharmacy education.

This study is based on the group's previous qualitative research and the Domestic and International literature reports. After thorough group discussion and expert consultation, this correspondence questionnaire was formed, with a total of 5 level 1 indicators corresponding to 37 level 2 indicators; it is divided into three parts: 1) a questionnaire on the basic information of the experts; 2) a scale for assessing the readiness of the pharmacy department of the medical institution to teach internships; and 3) a quantitative scale for the degree of authority of the experts.

Given your expertise and practical experience in this field, you are invited to act as a correspondence expert. We will follow the principles of scientific research keep your information confidential and use it only for statistical analysis. We are very much looking forward to your guidance and assistance, and hope that you will return your valuable comments within 1 week. Thank you for your support and guidance for this study! We wish you good health and success in your work!

Part I. Basic information questionnaire for experts

This survey is only for this research consulting experts in the basic situation investigation and analysis, strictly abiding by the principle of confidentiality, please fill in your situation, or select the option you think is appropriate, thank you for your cooperation!

1. Name

2. Gender

3. Age (years)

4. Years of experience in pharmacy:

5. Work sector:

6. Title ( ) A Senior B Deputy Senior C Intermediate D Junior E Other ( Please specify: )

7. Administrative positions:

8. Full name of the working hospital:

9. Level of your hospital ( ) Level of hospital: A Level 3A; B Level 3B; C Level 2A; D Other (please specify: )

10. familiarity with pharmacy practice leadership ( ) A very familiar B familiar C average D unfamiliar E very unfamiliar

Part II Evaluation of the Importance of the Indicators of the Self-Assessment Scale of Readiness to Teach Internships in Pharmacy Departments in Healthcare Organizations

Instructions for Completion
 1. Please rate the importance of the indicators according to the following instructions and requirements to determine their level of importance in the selection of indicators.
 (1) Importance of Indicators: Response to the degree of importance and representativeness of the indicators. It is divided into 5 grades according to its importance: very important, relatively important, generally important, not too important, and unimportant, and is assigned 5, 4, 3, 2, and 1 points respectively.
 2. If there are modification items: language modification, or entry deletion, entry addition, entry merger, please fill in the corresponding modification column.

| the Indicators of the Self-Assessment Scale of Readiness to Teach Internships Level 1 Indicators | Not important (1 point) | Less important (2 points) | General importance (3 points) | More important (4 points) | Very important (5 points) | Indicator revision |
| --- | --- | --- | --- | --- | --- | --- |
| 1.Readiness of the organizational structure for teaching internships |  |  |  |  |  |  |
| 2. Internship content readiness |  |  |  |  |  |
| 3. Readiness of the internship model |  |  |  |  |  |
| 4. Readiness to assess the effectiveness of internships |  |  |  |  |  |
| 5. Preparedness for Emergency Management for Internship Leaders |  |  |  |  |  |
| the Indicators of the Self-Assessment Scale of Readiness to Teach Internships Level 2 Indicators | Not important (1 point) | Less important (2 points) | General importance (3 points) | More important (4 points) | Very important (5 points) | Indicator revision |
| 1.1 Whether there are sound rules and regulations for internship management |  |  |  |  |  |  |
| 1.2 Availability of relevant hardware and facilities in line with internship leading |  |  |  |  |  |
| 1.3 Availability of an internship leadership team |  |  |  |  |  |
| 1.4 Availability of a selection program for lead teachers |  |  |  |  |  |
| 1.5 Preparedness for Emergency Management for Internship Leaders |  |  |  |  |  |
| 1.6 Availability of a detailed internship lead syllabus or handbook |  |  |  |  |  |
| 1.7 Availability of an individualized banding program tailored to the individual's needs |  |  |  |  |  |
| 1.8 Whether the lead teacher receives regular training in relevant teaching and pharmacy service training |  |  |  |  |  |
| 2.1 Whether interns are provided with training on career orientation and work ethics to enhance their awareness of the profession and their future career plans |  |  |  |  |  |
| 2.2 Whether there is pre-service training to introduce the relevant pharmacy rules and regulations of the hospital and the department, the management rules for interns, and the departmental setup and functions of the department, etc. |  |  |  |  |  |
| 2.3 Whether there is a detailed time schedule and teaching plan for the progress of internship teaching in the internship teaching department |  |  |  |  |  |
| 2.4 Availability of training in hospital pharmacy job content and workflow |  |  |  |  |  |
| 2.5 Availability of medication dispensing skills, management skills and practices |  |  |  |  |  |
| 2.6 Availability of medication counseling and medication instruction skills and practices |  |  |  |  |  |
| 2.7 Availability of pharmacy information technology operating system learning |  |  |  |  |  |
| 2.8 Availability of PIVAS job profile learning |  |  |  |  |  |
| 2.9 Availability of training on adverse drug reaction management and reporting process |  |  |  |  |  |
| 2.10 Whether there are teaching internships for clinical pharmacists specializing in prescription review, formulation of pharmacy monitoring plans, clinical medication guidance, rational medication evaluation, etc. |  |  |  |  |  |
| 2.11 Whether interns are trained in core competencies such as communication skills, clinical thinking skills, research thinking skills, self-directed learning skills, critical thinking, etc. |  |  |  |  |  |
| 2.12 Whether the lead teacher shows humanistic care for the interns in the process of teaching (concern for physical and mental health, attention to the interns' ideas and suggestions) |  |  |  |  |  |
| 3.1 Whether or not the lead instructor uses a diversified internship teaching model (e.g., problem-oriented and case-oriented teaching models; diversified pathways: e.g., combination of online and offline) |  |  |  |  |  |
| 3.2 Whether to rationally arrange the content of teaching according to the length of internship time |  |  |  |  |  |
| 3.3 Whether the content of teaching is organized in accordance with the intern's practical needs and learning abilities |  |  |  |  |  |
| 3.4 Whether interns have some freedom of time |  |  |  |  |  |
| 3.5 Whether it is a combination of theoretical and practical model of teaching and learning |  |  |  |  |  |
| 4.1 Whether interns are consulted to assess each individual's internship needs |  |  |  |  |  |
| 4.2 Whether the learning environment is assessed to meet the needs of the interns |  |  |  |  |  |
| 4.3 Whether or not the intern is assessed on whether the content of the internship meets the needs of the internship |  |  |  |  |  |
| 4.4 Whether interns are assessed to have appropriate basic knowledge before joining the department |  |  |  |  |  |
| 4.5 Is there a dynamic evaluation of the internship process |  |  |  |  |  |
| 4.6 Whether the assessment of interns includes theoretical examinations and clinical practice tests |  |  |  |  |  |
| 4.7 Whether there is an evaluation of the effectiveness of the supervisor's supervision by the internship supervision team |  |  |  |  |  |
| 4.8 Availability of interns' assessment of the effectiveness of the lead teacher's guidance |  |  |  |  |  |
| 5.1 Whether to establish contact information for interns and lead teachers |  |  |  |  |  |
| 5.2 Availability of two-way feedback channels for problems in the teaching-learning process |  |  |  |  |  |
| 5.3 Availability of emergency plans for personal safety and health and safety |  |  |  |  |  |
| 5.4 Whether to educate interns on occupational safety and promote self-protection awareness |  |  |  |  |  |

Part III. Quantification of the degree of authority of experts

1. Your familiarity with the content of this study ( )

A. unfamiliar B. not too familiar C. generally familiar D. quite familiar E. very familiar

2. "Quantitative Table of Judgment and Degree of Influence". When judging the indicators, you are usually influenced to different degrees by four aspects: practical experience, theoretical analysis, domestic and foreign literature and intuitive feeling, etc. The influence of each aspect on your judgment can be divided into three degrees: large, medium and small, so please tick the corresponding boxes of the four entries according to your own situation.

| Basis of judgment | Degree of impact | | |
| --- | --- | --- | --- |
| large | medium | small |
| theoretical analysis |  |  |  |
| practical experience |  |  |  |
| Domestic and International Literature |  |  |  |
| intuition |  |  |  |

This concludes the survey, and thanks again for your guidance!
