# Supplementary material for: Construction of a self-assessment tool for the readiness of pharmacy departments for internship teaching in public healthcare organizations-An Exploratory Mixed Study
Source: Research Square preprint supplement (doi:10.21203/rs.3.rs-4222246/v1), 2024-04-15
Supplement: Supplementary file 3 [file c08a003a37a239cc5952c482.docx]

Expert informed consent

Pharmacy departments of medical institutions undertake the task of teaching many pharmaceutical interns each year, and hospital pharmacy internship is a key transition stage for pharmacy students to transform into hospital pharmacists. To meet the interns' internship needs and achieve satisfactory internship results, pharmacy departments need to make good preparations in terms of organizational structure, internship content, internship mode, effect evaluation, and emergency management. Therefore, it is important to accurately assess the preparedness of pharmacy departments for internships. The purpose of this survey is to screen out the most important indicators that can best reflect internship teaching, and accordingly construct a self-assessment tool indicator system for pharmacy departments in healthcare organizations to assess their readiness for internship teaching. Given your professional knowledge and practical experience in this field, we would like to invite you as a correspondence expert, we will send you the questionnaire by questionnaire star, and hope that you will return the results within one week after receiving the questionnaire.

Your data will be treated in the strictest confidence, by the principles of scientific research, and will only be used for statistical analysis. There are no known risks to completing this survey. If you are unsure about something, please contact us immediately so that we can discuss the best way to deal with your problem. If you no longer wish to participate in this study, you may withdraw at any time. If you change your mind after completing the questionnaire, the results of your responses cannot be withdrawn.

I have read and am aware of the information provided and have been allowed to ask questions. I am voluntarily participating in the survey and can withdraw at any time without reason. If you agree and approve of the above, please sign your name in brackets and begin answering the questions. If you do not agree or approve of the above, this questionnaire research project will be discontinued.

Agreed: ( )

**Indicator System for Readiness of Pharmacy Departments in Healthcare Organizations to Teach Internships - Second Round of Expert Correspondence**

Dear Expert: Greetings!

Thank you very much for your guidance and help in the first round of the correspondence survey. According to the research results of 19 experts in the first round of correspondence and inquiry, the mean, standard deviation, and coefficient of variation of each index are calculated. The valuable opinions of the experts are synthesized and organized to form the second round of experts' correspondence questionnaires. Now we invite you to evaluate the revised indicators again and make suggestions. The questionnaire is divided into three parts: the first part of the experts' information; the second part of the experts' opinion feedback form; and the third part of the score sheet for the readiness of pharmacy departments of medical institutions to teach internships. To ensure the progress of the study, we hope to receive your response within one week. Your support and guidance for this study are sincerely appreciated! We wish you good health and success in your endeavors!

Part I. Basic information on experts

1. Name: _________________________________

Part II expert feedback collection form

The following are the expert opinions we collected in the first round of the questionnaire. You may express your opinion on the expert feedback: 1 Strongly disagree, 2 Disagree, 3 Not sure, 4 Agree, 5 Strongly agree. Please select the option you think is appropriate. After processing and analyzing the data from the first round of expert correspondence, indicators that will have an average importance score of <4.0 or a coefficient of variation >0.25 will continue to be consulted for expert opinion.

2. Do you agree to change the language of the following indicators?

|  | 1 (Strongly disagree) | 2 (disagree) | 3 (not necessarily) | 4 (Agreed) | 5 (Strongly Agree) |
| --- | --- | --- | --- | --- | --- |
| For the first level indicator "Internship content readiness", it is proposed to replace it with "Teaching content readiness of internship". |  |  |  |  |  |
| 2.1 Whether interns are provided with professional orientation and ethics training to enhance their awareness of the profession and their future career be Changed to "Whether interns are provided with professional orientation and ethics training" |  |  |  |  |  |
| 2.2 Whether there is any pre-service training, introduction to the relevant rules and regulations of the hospital and the department of pharmacy, management rules for interns, departmental settings and functions of the department, etc. be changed to "The content of the pre-service training is well developed, including an introduction to the relevant pharmacy rules and regulations of the hospital and the department, the management rules for interns, and an introduction to the departmental settings and functions of the department" |  |  |  |  |  |
| 2.10 Whether there are teaching internships for clinical pharmacists specializing in prescription review, formulation of pharmacy monitoring plans, clinical medication guidance, rational medication evaluation, etc. should be changed to "Whether there are teaching internships of specialized skills for clinical pharmacists". |  |  |  |  |  |
| 2.11 Whether interns are trained in core competencies such as communication skills, clinical thinking skills, research thinking skills, self-directed learning skills, critical thinking, etc. should be changed to "Whether interns are trained in core pharmacist competencies" |  |  |  |  |  |
| 4.5 Is there a dynamic evaluation of the internship process should be changed to “Whether there is a regular or periodic evaluation of the internship process" |  |  |  |  |  |

3. Do you agree with the deletion of the following indicator?
 In the results of the first round of consultations, the mean value of the following indicators was less than 4.0 and the coefficient of variation was >0.25, so the experts were consulted again on whether they agreed to their deletion

|  | 1 (Strongly disagree) | 2 (disagree) | 3 (not necessarily) | 4 (Agreed) | 5 (strongly agree) |
| --- | --- | --- | --- | --- | --- |
| 5. Preparedness for Emergency Management for Internship Leaders |  |  |  |  |  |
| 1.7 Availability of individualized teaching programmes tailored to the needs of the students |  |  |  |  |  |
| 3.4 Whether interns have some freedom of time |  |  |  |  |  |
| 4.1 Whether interns are consulted to assess each individual's internship needs |  |  |  |  |  |
| 4.2 Whether the learning environment is assessed to meet the needs of the interns |  |  |  |  |  |
| 4.4 Whether interns are assessed to have the appropriate basic knowledge before joining the department |  |  |  |  |  |

4. If you have other comments and suggestions, please fill in the box below, or none if you do not.

_________________________________

Part III Healthcare Facility Pharmacy Department Internship Leadership Readiness Scale

Please rate your current level of preparedness of the pharmacy department of your healthcare facility in five areas: organizational structure of internship teaching, content of internship teaching, model of internship teaching, assessment of internship effectiveness, and emergency management, on a scale from 0-100, with higher ratings indicating better preparedness. Please select the option you think is appropriate.

1. Please rate your level of preparedness in terms of organizational structure for teaching internships in the pharmacy departments of healthcare institutions at present.

|  | 0 | 10 | 20 | 30 | 40 | 50 | 60 | 70 | 80 | 90 | 100 |
| --- | --- | --- | --- | --- | --- | --- | --- | --- | --- | --- | --- |
| Whether there are sound rules and regulations for internship management |  |  |  |  |  |  |  |  |  |  |  |
| Availability of relevant hardware and facilities in line with internship leading |  |  |  |  |  |  |  |  |  |  |  |
| Availability of an internship leadership team |  |  |  |  |  |  |  |  |  |  |  |
| Availability of a selection program for lead teachers |  |  |  |  |  |  |  |  |  |  |  |
| Availability of job descriptions for lead teachers |  |  |  |  |  |  |  |  |  |  |  |
| Availability of a detailed internship lead syllabus or handbook |  |  |  |  |  |  |  |  |  |  |  |
| Availability of an individualized banding program tailored to the individual's needs |  |  |  |  |  |  |  |  |  |  |  |
| Whether the lead teacher receives regular training in relevant teaching and pharmacy service training |  |  |  |  |  |  |  |  |  |  |  |

6. Please rate the current level of preparedness of the pharmacy departments of healthcare organizations with regard to the content of teaching in internships

|  | 0 | 10 | 20 | 30 | 40 | 50 | 60 | 70 | 80 | 90 | 100 |
| --- | --- | --- | --- | --- | --- | --- | --- | --- | --- | --- | --- |
| Whether interns are provided with vocational orientation and professional ethics training |  |  |  |  |  |  |  |  |  |  |  |
| The content of the pre-service training is well developed, including an introduction to the relevant pharmacy rules and regulations of the hospital and the department, the management rules for interns, and an introduction to the departmental settings and functions of the department |  |  |  |  |  |  |  |  |  |  |  |
| Whether there is a detailed time schedule and teaching plan for the progress of internship teaching in the internship teaching department |  |  |  |  |  |  |  |  |  |  |  |
| Availability of training in hospital pharmacy job content and workflow |  |  |  |  |  |  |  |  |  |  |  |
| Availability of dispensing skills, management skills and practice of medicines |  |  |  |  |  |  |  |  |  |  |  |
| Availability of medication counseling and medication instruction skills and practices |  |  |  |  |  |  |  |  |  |  |  |
| Availability of pharmacy information technology operating system learning |  |  |  |  |  |  |  |  |  |  |  |
| Availability of PIVAS job profile learning |  |  |  |  |  |  |  |  |  |  |  |
| Availability of training on adverse drug reaction handling and reporting process |  |  |  |  |  |  |  |  |  |  |  |
| Whether there are teaching internships of specialized skills for clinical pharmacists |  |  |  |  |  |  |  |  |  |  |  |
| Whether interns are trained in core pharmacist competencies |  |  |  |  |  |  |  |  |  |  |  |
| Whether the lead teacher shows humanistic care for the interns in the process of teaching (concern for physical and mental health, attention to the interns' ideas and suggestions) |  |  |  |  |  |  |  |  |  |  |  |

7. Please rate the current level of preparedness of pharmacy departments in healthcare organizations with regard to the internship teaching model

|  | 0 | 10 | 20 | 30 | 40 | 50 | 60 | 70 | 80 | 90 | 100 |
| --- | --- | --- | --- | --- | --- | --- | --- | --- | --- | --- | --- |
| Whether the lead instructor uses a diversified internship teaching model (e.g., problem-oriented and case-oriented teaching models; diversified pathways: e.g., combination of online and offline) |  |  |  |  |  |  |  |  |  |  |  |
| Whether to rationally arrange the content of teaching according to the length of internship time |  |  |  |  |  |  |  |  |  |  |  |
| Whether the content of teaching is organized in accordance with the intern's practical needs and learning abilities |  |  |  |  |  |  |  |  |  |  |  |
| Whether interns have some freedom of time |  |  |  |  |  |  |  |  |  |  |  |
| Whether it is a combination of theoretical and practical model of teaching and learning |  |  |  |  |  |  |  |  |  |  |  |

8. Please rate the current level of preparedness of the pharmacy department of a healthcare organization to assess the effectiveness of internship teaching

|  | 0 | 10 | 20 | 30 | 40 | 50 | 60 | 70 | 80 | 90 | 100 |
| --- | --- | --- | --- | --- | --- | --- | --- | --- | --- | --- | --- |
| Whether interns are consulted to assess each individual's internship needs |  |  |  |  |  |  |  |  |  |  |  |
| Whether the learning environment is assessed to meet the needs of the interns |  |  |  |  |  |  |  |  |  |  |  |
| Whether or not the intern is assessed on whether the content of the internship meets the needs of the internship |  |  |  |  |  |  |  |  |  |  |  |
| Whether interns are assessed to have the appropriate basic knowledge before joining the department |  |  |  |  |  |  |  |  |  |  |  |
| Whether there is a regular or periodic evaluation of the internship process |  |  |  |  |  |  |  |  |  |  |  |
| Whether the assessment of interns includes theoretical examinations and clinical practice tests |  |  |  |  |  |  |  |  |  |  |  |
| Whether or not there is an evaluation of the effectiveness of the supervisor's supervision by the internship supervisory team |  |  |  |  |  |  |  |  |  |  |  |
| Availability of interns' assessment of the effectiveness of the lead teacher's guidance |  |  |  |  |  |  |  |  |  |  |  |

9. Please rate the current level of preparedness of the pharmacy department of a healthcare organization in the area of emergency management of internships and teaching

|  | 0 | 10 | 20 | 30 | 40 | 50 | 60 | 70 | 80 | 90 | 100 |
| --- | --- | --- | --- | --- | --- | --- | --- | --- | --- | --- | --- |
| Whether to establish contact information for interns and lead teachers |  |  |  |  |  |  |  |  |  |  |  |
| Whether there are two-way feedback channels for problems in the teaching-learning process |  |  |  |  |  |  |  |  |  |  |  |
| Availability of emergency plans for personal safety and health and safety |  |  |  |  |  |  |  |  |  |  |  |
| Whether to educate interns on occupational safety and promote self-protection awareness |  |  |  |  |  |  |  |  |  |  |  |

This concludes the questionnaire and thank you again for your guidance!
