# Supplementary material for: Construction of a self-assessment tool for the readiness of pharmacy departments for internship teaching in public healthcare organizations-An Exploratory Mixed Study
Source: Research Square preprint supplement (doi:10.21203/rs.3.rs-4222246/v1), 2024-04-15
Supplement: Supplementary file 4 [file f0724b1342c7ac5c7bc665c7.docx]

**Appendix 1:** Good Reporting of A Mixed Methods Study (GRAMMS) checklist

| (1) | Describe the justification for using a mixed methods  approach to the research question | Introduction: Page 4 |
| --- | --- | --- |
| (2) | Describe the design in terms of the purpose, priority and  sequence of methods | Study design: Page 4 |
| (3) | Describe each method in terms of sampling, data collection  and analysis | Data collection or Data analysis: Page 5-7 |
| (4) | Describe where integration has occurred, how it has  occurred and who has participated in it | Methods: Page 5-6 |
| (5) | Describe any limitation of one method associated with the  present of the other method | Strengths and limitations: Page 14 |
| (6) | Describe any insights gained from mixing or integrating  methods | Throughout results  and discussion  Table 2 |
